# Supplementary material for: System Biology Approach to Identify the Hub Genes and Pathways Associated with Human H5N1 Infection
Source: MDPI journal article supplement (doi:10.3390/vaccines11071269), 2023-07-21

**Supplementary Table S1: List of Human H5N1 infection associated genes retrieved from the NCBI-gene database**

| S. No. | Gene ID | Symbol  | Aliases                                                                          | Description                                                     |
|--------|---------|---------|----------------------------------------------------------------------------------|-----------------------------------------------------------------|
| 1.     | 3569    | IL6     | BSF-2, BSF2, CDF, HGF, HSF, IFN-beta-2, IFNB2, IL-6                              | interleukin 6                                                   |
| 2.     | 1401    | CRP     | PTX1                                                                             | C-reactive protein                                              |
| 3.     | 3576    | CXCL8   | GCP-1, GCP1, IL8, LECT, LUCT, LYNAP, MDNCF, MONAP, NAF, NAP-1, NAP1, SCYB8       | C-X-C motif chemokine ligand 8                                  |
| 4.     | 4780    | NFE2L2  | HEBP1, IMDDHH, NRF2, Nrf-2                                                       | NFE2 like bZIP transcription factor 2                           |
| 5.     | 406991  | MIR21   | MIRN21, hsa-mir-21, miR-21, miRNA21                                              | microRNA 21                                                     |
| 6.     | 6647    | SOD1    | ALS, ALS1, HEL-S-44, IPOA, SOD, STAHP, hSod1, homodimer                          | superoxide dismutase 1                                          |
| 7.     | 1432    | MAPK14  | CSBP, CSBP1, CSBP2, CSPB1, EXIP, Mxi2, PRKM14, PRKM15, RK, SAPK2A, p38, p38ALPHA | mitogen-activated protein kinase 14                             |
| 8.     | 8743    | TNFSF10 | APO2L, Apo-2L, CD253, TL2, TNLG6A, TRAIL                                         | TNF superfamily member 10                                       |
| 9.     | 3725    | JUN     | AP-1, AP1, c-Jun, cJUN, p39                                                      | Jun proto-oncogene, AP-1 transcription factor subunit           |
| 10.    | 861     | RUNX1   | AML1, AML1-EVI-1, AMLCR1, CBF2alpha, CBFA2, EVI-1, PEBP2aB, PEBP2alpha           | RUNX family transcription factor 1                              |
| 11.    | 2335    | FN1     | CIG, ED-B, FINC, FN, FNZ, GFND, GFND2, LETS, MSF, SMDCF                          | fibronectin 1                                                   |
| 12.    | 3627    | CXCL10  | C7, IFI10, INP10, IP-10, SCYB10, crg-2, gIP-10, mob-1                            | C-X-C motif chemokine ligand 10                                 |
| 13.    | 5599    | MAPK8   | JNK, JNK-46, JNK1, JNK1A2, JNK21B1/2, PRKM8, SAPK1, SAPK1c                       | mitogen-activated protein kinase 8                              |
| 14.    | 4893    | NRAS    | ALPS4, CMNS, KRAS, N-ras, NCMS1, NS6, NRAS                                       | NRAS proto-oncogene, GTPase                                     |
| 15.    | 23586   | RIGI    | DDX58, RIG-I, RIG1, RLR-1, SGMRT2                                                | RNA sensor RIG-I                                                |
| 16.    | 30835   | CD209   | CDSIGN, CLEC4L, DC-SIGN, DC-SIGN1, hDC-SIGN                                      | CD209 molecule                                                  |
| 17.    | 3456    | IFNB1   | IFB, IFF, IFN-beta, IFNB                                                         | interferon beta 1                                               |
| 18.    | 7341    | SUMO1   | DAPI, GMP1, OFC10, PIC1, SENP2, SMT3, SMT3C, SMT3H3, UBL1                        | small ubiquitin like modifier 1                                 |
| 19.    | 3551    | IKBKB   | IKK-beta, IKK2, IKKB, IMD15, IMD15A, IMD15B, NFKBIKB                             | inhibitor of nuclear factor kappa B kinase subunit beta         |
| 20.    | 3661    | IRF3    | IIAE7                                                                            | interferon regulatory factor 3                                  |
| 21.    | 4691    | NCL     | C23, Nsr1                                                                        | nucleolin                                                       |
| 22.    | 1147    | CHUK    | BPS2, IKBKA, IKK-alpha, IKK1, IKKA, NFKBIKA, TCF16                               | component of inhibitor of nuclear factor kappa B kinase complex |
| 23.    | 3439    | IFNA1   | IFL, IFN, IFN-ALPHA, IFN-alphaD3, IFNA@, leIF D, IFNA1                           | interferon alpha 1                                              |
| 24.    | 634     | CEACAM1 | BGP, BGP1, BGPI                                                                  | CEA cell adhesion molecule 1                                    |
| 25.    | 6441    | SFTPD   | COLEC7, PSP-D, SFTP4, SP-D                                                       | surfactant protein D                                            |
| 26.    | 6885    | MAP3K7  | CSCF, FMD2, MEKK7, TAK1, TGF1a                                                   | mitogen-activated protein kinase kinase kinase 7                |
| 27.    | 406933  | MIR141  | MIRN141, mir-141                                                                 | microRNA 141                                                    |
| 28.    | 83737   | ITCH    | ADMFD, AIF4, AIP4, NAPP1                                                         | itchy E3 ubiquitin protein ligase                               |
| 29.    | 29108   | PYCARD  | ASC, CARD5, TMS, TMS-1, TMS1                                                     | PYD and CARD domain containing                                  |
| 30.    | 4928    | NUP98   | ADIR2, NUP196, NUP96, Nup98-96                                                   | nucleoporin 98 and 96 precursor                                 |
| 31.    | 10410   | IFITM3  | 1-8U, DSPA2b, IP15                                                               | interferon induced transmembrane protein 3                      |

|     |        |         |                                                                               |                                                    |
|-----|--------|---------|-------------------------------------------------------------------------------|----------------------------------------------------|
| 32. | 23513  | SCRIB   | CRIB1, SCRB11, Vartul, oSCRIB, SCRIB                                          | scribble planar cell polarity protein              |
| 33. | 843    | CASP10  | ALPS2, FLICE-2, FLICE2, MCH4                                                  | caspase 10                                         |
| 34. | 10537  | UBD     | FAT10, GABBR1-3, UBD                                                          | ubiquitin D                                        |
| 35. | 51079  | NDUFA13 | B16.6, CDA016, CGI-39, GRIM-19, GRIM19, MC1DN28                               | NADH:ubiquinone oxidoreductase subunit A13         |
| 36. | 10482  | NXF1    | MEX67, TAP                                                                    | nuclear RNA export factor 1                        |
| 37. | 2533   | FYB1    | ADAP, FYB, PRO0823, SLAP-130, SLAP130, THC3                                   | FYN binding protein 1                              |
| 38. | 6484   | ST3GAL4 | CGS23, NANTA3, SAT3, SIAT4, SIAT4C, ST-4, ST3GalA.2, ST3GalIV, STZ, gal-NAc6S | ST3 beta-galactoside alpha-2,3-sialyltransferase 4 |
| 39. | 220972 | MARCHF8 | CMIR, MARCH-VIII, MARCH8, MIR, RNF178, c-MIR                                  | membrane associated ring-CH-type finger 8          |

**Supplementary Table S2: Details about nodes and edges in PPI network**

| <b>Nodes</b>                                                                                                |                                                                                                                                                 |
|-------------------------------------------------------------------------------------------------------------|-------------------------------------------------------------------------------------------------------------------------------------------------|
| 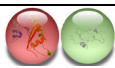<br>Node color             | Colored nodes represent query proteins and first shell of interactions whereas white color nodes represent second shell of interactions.        |
| <br>Node Content           | Empty node represents protein of unknown 3D structure whereas filled node represents some 3D structure is known/predicted                       |
| <b>Edges</b>                                                                                                |                                                                                                                                                 |
| <br>Known Interactions     | Azure-blue color between nodes represents curated databases whereas purple color edges represent experimentally determined                      |
| <br>Predicted interactions | Green color edges represent gene neighbourhood, red color edges represent gene fusions and blue color edges represents gene co-occurrence       |
| <br>Others                | Olive green color edges represent text mining, black color edges represent co-expression, and light blue color edges represent protein homology |

**Supplementary Table S3: KEGG pathways involved in H5N1 infection**

| Term                                                     | Count | %           | P-value  | Genes                                                                                                  |
|----------------------------------------------------------|-------|-------------|----------|--------------------------------------------------------------------------------------------------------|
| hsa04622:RIG-I-like receptor signaling pathway           | 12    | 30.76923077 | 1.34E-15 | IKBKB, CXCL10, MAPK8, CXCL8, CHUK, IRF3, IFNA1, IFNB1, CASP10, MAPK14, MAP3K7, RIGI                    |
| hsa05161:Hepatitis B                                     | 14    | 35.8974359  | 1.85E-14 | JUN, CXCL8, IFNA1, CHUK, IFNB1, MAPK14, IKBKB, IL6, NRAS, MAPK8, IRF3, CASP10, MAP3K7, RIGI            |
| hsa05417:Lipid and atherosclerosis                       | 15    | 38.46153846 | 2.67E-14 | JUN, CXCL8, IFNA1, CHUK, IFNB1, MAPK14, PYCARD, IKBKB, IL6, NRAS, MAPK8, IRF3, TNFSF10, MAP3K7, NFE2L2 |
| hsa05135:Yersinia infection                              | 13    | 33.33333333 | 8.05E-14 | JUN, FYB1, CXCL8, CHUK, IFNB1, FN1, MAPK14, PYCARD, IKBKB, IL6, MAPK8, IRF3, MAP3K7                    |
| hsa04620:Toll-like receptor signaling pathway            | 12    | 30.76923077 | 1.28E-13 | IKBKB, CXCL10, IL6, JUN, MAPK8, CXCL8, CHUK, IRF3, IFNA1, IFNB1, MAPK14, MAP3K7                        |
| hsa05164:Influenza A                                     | 13    | 33.33333333 | 1.17E-12 | CXCL8, IFNA1, CHUK, IFNB1, PYCARD, IKBKB, CXCL10, NXF1, IL6, IRF3, TNFSF10, NUP98, RIGI                |
| hsa04668:TNF signaling pathway                           | 11    | 28.20512821 | 1.12E-11 | IKBKB, CXCL10, IL6, ITCH, JUN, MAPK8, CHUK, IFNB1, CASP10, MAPK14, MAP3K7                              |
| hsa05171:Coronavirus disease - COVID-19                  | 13    | 33.33333333 | 4.37E-11 | JUN, CXCL8, IFNA1, CHUK, IFNB1, MAPK14, IKBKB, CXCL10, IL6, MAPK8, IRF3, MAP3K7, RIGI                  |
| hsa04621:NOD-like receptor signaling pathway             | 12    | 30.76923077 | 7.11E-11 | PYCARD, IKBKB, IL6, JUN, MAPK8, CXCL8, CHUK, IRF3, IFNA1, IFNB1, MAPK14, MAP3K7                        |
| hsa04623:Cytosolic DNA-sensing pathway                   | 9     | 23.07692308 | 9.49E-11 | PYCARD, IKBKB, CXCL10, IL6, CHUK, IRF3, IFNA1, IFNB1, RIGI                                             |
| hsa05162:Measles                                         | 11    | 28.20512821 | 9.80E-11 | IKBKB, IL6, JUN, MAPK8, CHUK, IRF3, IFNA1, IFNB1, CD209, MAP3K7, RIGI                                  |
| hsa05169:Epstein-Barr virus infection                    | 12    | 30.76923077 | 1.95E-10 | IKBKB, CXCL10, IL6, JUN, MAPK8, CHUK, IRF3, IFNA1, IFNB1, MAPK14, MAP3K7, RIGI                         |
| hsa04657:IL-17 signaling pathway                         | 9     | 23.07692308 | 2.50E-09 | IKBKB, CXCL10, IL6, JUN, MAPK8, CXCL8, CHUK, MAPK14, MAP3K7                                            |
| hsa05167:Kaposi sarcoma-associated herpesvirus infection | 11    | 28.20512821 | 2.62E-09 | IKBKB, IL6, JUN, NRAS, MAPK8, CXCL8, CHUK, IRF3, IFNA1, IFNB1, MAPK14                                  |
| hsa05130:Pathogenic Escherichia coli infection           | 11    | 28.20512821 | 3.04E-09 | PYCARD, IKBKB, IL6, JUN, MAPK8, CXCL8, CHUK, NCL, TNFSF10, MAPK14, MAP3K7                              |
| hsa04936:Alcoholic liver disease                         | 10    | 25.64102564 | 3.06E-09 | IKBKB, IL6, MAPK8, CXCL8, CHUK, IRF3, IFNA1, IFNB1, MAPK14, MAP3K7                                     |
| hsa04625:C-type lectin receptor signaling pathway        | 9     | 23.07692308 | 5.64E-09 | PYCARD, IKBKB, IL6, JUN, NRAS, MAPK8, CHUK, CD209, MAPK14                                              |
| hsa05170:Human immunodeficiency virus 1 infection        | 10    | 25.64102564 | 1.02E-07 | IKBKB, JUN, NRAS, MAPK8, CHUK, IRF3, IFNA1, IFNB1, MAPK14, MAP3K7                                      |
| hsa05142:Chagas disease                                  | 8     | 20.51282051 | 1.26E-07 | IKBKB, IL6, JUN, MAPK8, CXCL8, CHUK, IFNB1, MAPK14                                                     |
| hsa05131:Shigellosis                                     | 10    | 25.64102564 | 3.75E-07 | PYCARD, IKBKB, JUN, MAPK8, CXCL8, CHUK, IRF3, IFNB1, MAPK14, MAP3K7                                    |

|                                                                     |    |             |             |                                                                      |
|---------------------------------------------------------------------|----|-------------|-------------|----------------------------------------------------------------------|
| hsa05132:Salmonella infection                                       | 10 | 25.64102564 | 4.02E-07    | PYCARD, IKBKB, IL6, JUN, MAPK8, CXCL8, CHUK, TNFSF10, MAPK14, MAP3K7 |
| hsa05133:Pertussis                                                  | 7  | 17.94871795 | 4.83E-07    | PYCARD, IL6, JUN, MAPK8, CXCL8, IRF3, MAPK14                         |
| hsa05418:Fluid shear stress and atherosclerosis                     | 8  | 20.51282051 | 1.05E-06    | IKBKB, JUN, MAPK8, CHUK, SUMO1, MAPK14, MAP3K7, NFE2L2               |
| hsa05208:Chemical carcinogenesis - reactive oxygen species          | 9  | 23.07692308 | 2.11E-06    | IKBKB, NDUFA13, JUN, NRAS, MAPK8, CHUK, MAPK14, SOD1, NFE2L2         |
| hsa04932:Non-alcoholic fatty liver disease                          | 8  | 20.51282051 | 2.19E-06    | IKBKB, IL6, NDUFA13, ITCH, JUN, MAPK8, CXCL8, MAPK14                 |
| hsa05163:Human cytomegalovirus infection                            | 9  | 23.07692308 | 2.25E-06    | IKBKB, IL6, NRAS, CXCL8, CHUK, IRF3, IFNA1, IFNB1, MAPK14            |
| hsa05160:Hepatitis C                                                | 8  | 20.51282051 | 2.39E-06    | IKBKB, CXCL10, NRAS, CHUK, IRF3, IFNA1, IFNB1, RIGI                  |
| hsa04933:AGE-RAGE signaling pathway in diabetic complications       | 7  | 17.94871795 | 2.46E-06    | IL6, JUN, NRAS, MAPK8, CXCL8, FN1, MAPK14                            |
| hsa04660:T cell receptor signaling pathway                          | 7  | 17.94871795 | 3.10E-06    | IKBKB, JUN, NRAS, MAPK8, CHUK, MAPK14, MAP3K7                        |
| hsa04659:Th17 cell differentiation                                  | 7  | 17.94871795 | 3.86E-06    | IKBKB, IL6, JUN, MAPK8, CHUK, MAPK14, RUNX1                          |
| hsa05120:Epithelial cell signaling in Helicobacter pylori infection | 6  | 15.38461538 | 7.90E-06    | IKBKB, JUN, MAPK8, CXCL8, CHUK, MAPK14                               |
| hsa04380:Osteoclast differentiation                                 | 7  | 17.94871795 | 1.03E-05    | IKBKB, JUN, MAPK8, CHUK, IFNB1, MAPK14, MAP3K7                       |
| hsa04068:FoxO signaling pathway                                     | 7  | 17.94871795 | 1.18E-05    | IKBKB, IL6, NRAS, MAPK8, CHUK, TNFSF10, MAPK14                       |
| hsa04210:Apoptosis                                                  | 7  | 17.94871795 | 1.46E-05    | IKBKB, JUN, NRAS, MAPK8, CHUK, CASP10, TNFSF10                       |
| hsa05200:Pathways in cancer                                         | 11 | 28.20512821 | 2.94E-05    | IKBKB, IL6, JUN, NRAS, MAPK8, CXCL8, CHUK, IFNA1, FN1, NFE2L2, RUNX1 |
| hsa05152:Tuberculosis                                               | 7  | 17.94871795 | 7.13E-05    | IL6, MAPK8, IFNA1, IFNB1, CD209, CASP10, MAPK14                      |
| hsa05165:Human papillomavirus infection                             | 8  | 20.51282051 | 2.90E-04    | IKBKB, NRAS, CHUK, IRF3, IFNA1, IFNB1, FN1, SCRIB                    |
| hsa05235:PD-L1 expression and PD-1 checkpoint pathway in cancer     | 5  | 12.82051282 | 4.24E-04    | IKBKB, JUN, NRAS, CHUK, MAPK14                                       |
| hsa04658:Th1 and Th2 cell differentiation                           | 5  | 12.82051282 | 4.81E-04    | IKBKB, JUN, MAPK8, CHUK, MAPK14                                      |
| hsa05168:Herpes simplex virus 1 infection                           | 9  | 23.07692308 | 6.22E-04    | IKBKB, NXF1, IL6, CHUK, IRF3, IFNA1, IFNB1, MAP3K7, RIGI             |
| hsa04064:NF-kappa B signaling pathway                               | 5  | 12.82051282 | 7.65E-04    | IKBKB, CXCL8, CHUK, MAP3K7, RIGI                                     |
| hsa04010:MAPK signaling pathway                                     | 7  | 17.94871795 | 0.001009226 | IKBKB, JUN, NRAS, MAPK8, CHUK, MAPK14, MAP3K7                        |
| hsa05145:Toxoplasmosis                                              | 5  | 12.82051282 | 0.001010668 | IKBKB, MAPK8, CHUK, MAPK14, MAP3K7                                   |
| hsa04722:Neurotrophin signaling pathway                             | 5  | 12.82051282 | 0.001266741 | IKBKB, JUN, NRAS, MAPK8, MAPK14                                      |
| hsa05166:Human T-cell leukemia virus 1 infection                    | 6  | 15.38461538 | 0.001811466 | IKBKB, IL6, JUN, NRAS, MAPK8, CHUK                                   |
| hsa05221:Acute myeloid leukemia                                     | 4  | 10.25641026 | 0.002417346 | IKBKB, NRAS, CHUK, RUNX1                                             |

|                                                                        |   |             |             |                                           |
|------------------------------------------------------------------------|---|-------------|-------------|-------------------------------------------|
| hsa04151:PI3K-Akt signaling pathway                                    | 7 | 17.94871795 | 0.002610658 | IKBKB, IL6, NRAS, CHUK, IFNA1, IFNB1, FN1 |
| hsa05220:Chronic myeloid leukemia                                      | 4 | 10.25641026 | 0.003460909 | IKBKB, NRAS, CHUK, RUNX1                  |
| hsa04217:Necroptosis                                                   | 5 | 12.82051282 | 0.00365088  | PYCARD, MAPK8, IFNA1, IFNB1, TNFSF10      |
| hsa04662:B cell receptor signaling pathway                             | 4 | 10.25641026 | 0.004288735 | IKBKB, JUN, NRAS, CHUK                    |
| hsa04912:GnRH signaling pathway                                        | 4 | 10.25641026 | 0.006097725 | JUN, NRAS, MAPK8, MAPK14                  |
| hsa04060:Cytokine-cytokine receptor interaction                        | 6 | 15.38461538 | 0.006154223 | CXCL10, IL6, CXCL8, IFNA1, IFNB1, TNFSF10 |
| hsa01523:Antifolate resistance                                         | 3 | 7.692307692 | 0.006421935 | IKBKB, IL6, CHUK                          |
| hsa01522:Endocrine resistance                                          | 4 | 10.25641026 | 0.007049885 | JUN, NRAS, MAPK8, MAPK14                  |
| hsa04062:Chemokine signaling pathway                                   | 5 | 12.82051282 | 0.007116274 | IKBKB, CXCL10, NRAS, CXCL8, CHUK          |
| hsa04061:Viral protein interaction with cytokine and cytokine receptor | 4 | 10.25641026 | 0.007454149 | CXCL10, IL6, CXCL8, TNFSF10               |
| hsa04650:Natural killer cell mediated cytotoxicity                     | 4 | 10.25641026 | 0.013976392 | NRAS, IFNA1, IFNB1, TNFSF10               |
| hsa04926:Relaxin signaling pathway                                     | 4 | 10.25641026 | 0.014884799 | JUN, NRAS, MAPK8, MAPK14                  |
| hsa05010:Alzheimer disease                                             | 6 | 15.38461538 | 0.017951774 | IKBKB, IL6, NDUFA13, NRAS, MAPK8, CHUK    |
| hsa05134:Legionellosis                                                 | 3 | 7.692307692 | 0.022017268 | PYCARD, IL6, CXCL8                        |
| hsa05020:Prion disease                                                 | 5 | 12.82051282 | 0.023351471 | IL6, NDUFA13, MAPK8, MAPK14, SOD1         |
| hsa04218:Cellular senescence                                           | 4 | 10.25641026 | 0.024557918 | IL6, NRAS, CXCL8, MAPK14                  |
| hsa04530:Tight junction                                                | 4 | 10.25641026 | 0.030185023 | JUN, MAPK8, SCRIB, RUNX1                  |
| hsa04664:Fc epsilon RI signaling pathway                               | 3 | 7.692307692 | 0.030573338 | NRAS, MAPK8, MAPK14                       |
| hsa04920:Adipocytokine signaling pathway                               | 3 | 7.692307692 | 0.031407485 | IKBKB, MAPK8, CHUK                        |
| hsa04917:Prolactin signaling pathway                                   | 3 | 7.692307692 | 0.032250658 | NRAS, MAPK8, MAPK14                       |
| hsa04137:Mitophagy - animal                                            | 3 | 7.692307692 | 0.033963754 | JUN, NRAS, MAPK8                          |
| hsa05212:Pancreatic cancer                                             | 3 | 7.692307692 | 0.037494687 | IKBKB, MAPK8, CHUK                        |
| hsa05140:Leishmaniasis                                                 | 3 | 7.692307692 | 0.038398776 | JUN, MAPK14, MAP3K7                       |
| hsa05022:Pathways of neurodegeneration - multiple diseases             | 6 | 15.38461538 | 0.040550345 | IL6, NDUFA13, NRAS, MAPK8, MAPK14, SOD1   |
| hsa04012:ErbB signaling pathway                                        | 3 | 7.692307692 | 0.045926839 | JUN, NRAS, MAPK8                          |
| hsa05210:Colorectal cancer                                             | 3 | 7.692307692 | 0.04690362  | JUN, NRAS, MAPK8                          |
| hsa05203:Viral carcinogenesis                                          | 4 | 10.25641026 | 0.048438384 | JUN, NRAS, IRF3, SCRIB                    |
| hsa05205:Proteoglycans in cancer                                       | 4 | 10.25641026 | 0.049025113 | NRAS, FN1, MIR21, MAPK14                  |

**Supplementary Table S4: Gene ontology for Human H5N1 infection associated genes****A) Biological Process**

| GO terms                                                                        | Count | %           | P-value     | Genes                                                                        |
|---------------------------------------------------------------------------------|-------|-------------|-------------|------------------------------------------------------------------------------|
| GO:0098586~cellular response to virus                                           | 8     | 20.51282051 | 3.06E-10    | CXCL10, IL6, CHUK, IRF3, IFNA1, IFNB1, MIR21, MAPK14                         |
| GO:0043065~positive regulation of apoptotic process                             | 9     | 23.07692308 | 2.00E-07    | PYCARD, IL6, JUN, MAPK8, UBD, TNFSF10, MIR21, SCRIB, SOD1                    |
| GO:0051607~defense response to virus                                            | 8     | 20.51282051 | 3.13E-07    | PYCARD, IFITM3, IL6, ITCH, IRF3, IFNA1, IFNB1, RIGI                          |
| GO:0006954~inflammatory response                                                | 9     | 23.07692308 | 1.12E-06    | PYCARD, CRP, IKBKB, CXCL10, IL6, ITCH, CXCL8, CHUK, NFE2L2                   |
| GO:0071276~cellular response to cadmium ion                                     | 5     | 12.82051282 | 1.23E-06    | JUN, MAPK8, CHUK, SUMO1, SOD1                                                |
| GO:0043123~positive regulation of I-kappaB kinase/NF-kappaB signaling           | 7     | 17.94871795 | 1.89E-06    | IKBKB, CHUK, IRF3, CASP10, UBD, TNFSF10, MAP3K7                              |
| GO:0071222~cellular response to lipopolysaccharide                              | 7     | 17.94871795 | 1.95E-06    | PYCARD, CXCL10, IL6, MAPK8, CXCL8, MIR21, MAPK14                             |
| GO:0010628~positive regulation of gene expression                               | 9     | 23.07692308 | 5.95E-06    | CRP, IL6, MAPK8, CXCL8, FN1, MIR21, MAPK14, RIGI, NFE2L2                     |
| GO:0071356~cellular response to tumor necrosis factor                           | 6     | 15.38461538 | 9.48E-06    | PYCARD, IKBKB, CXCL8, CHUK, MAPK14, NFE2L2                                   |
| GO:0045944~positive regulation of transcription from RNA polymerase II promoter | 12    | 30.76923077 | 1.33E-05    | IKBKB, CXCL10, IL6, JUN, CHUK, IRF3, IFNB1, NCL, MAPK14, RIGI, NFE2L2, RUNX1 |
| GO:0009615~response to virus                                                    | 5     | 12.82051282 | 6.57E-05    | IFITM3, IKBKB, CHUK, IFNB1, RIGI                                             |
| GO:0060337~type I interferon signaling pathway                                  | 4     | 10.25641026 | 9.43E-05    | IFITM3, IRF3, IFNA1, IFNB1                                                   |
| GO:0001525~angiogenesis                                                         | 6     | 15.38461538 | 1.28E-04    | CEACAM1, JUN, CXCL8, NCL, FN1, MAPK14                                        |
| GO:0045087~innate immune response                                               | 8     | 20.51282051 | 1.46E-04    | PYCARD, CRP, IKBKB, ITCH, CHUK, CD209, SFTPD, RIGI                           |
| GO:0006915~apoptotic process                                                    | 8     | 20.51282051 | 1.58E-04    | PYCARD, ITCH, JUN, IRF3, CASP10, TNFSF10, MAPK14, SOD1                       |
| GO:0007252~I-kappaB phosphorylation                                             | 3     | 7.692307692 | 2.46E-04    | IKBKB, CHUK, MAP3K7                                                          |
| GO:0051403~stress-activated MAPK cascade                                        | 3     | 7.692307692 | 5.03E-04    | IKBKB, MAPK8, MAP3K7                                                         |
| GO:0071360~cellular response to exogenous dsRNA                                 | 3     | 7.692307692 | 6.31E-04    | IRF3, IFNB1, RIGI                                                            |
| GO:0032088~negative regulation of NF-kappaB transcription factor activity       | 4     | 10.25641026 | 7.83E-04    | PYCARD, ITCH, CHUK, MIR21                                                    |
| GO:0038095~Fc-epsilon receptor signaling pathway                                | 3     | 7.692307692 | 9.30E-04    | IKBKB, MAPK8, MAP3K7                                                         |
| GO:0032727~positive regulation of interferon-alpha production                   | 3     | 7.692307692 | 0.001189786 | CHUK, IRF3, RIGI                                                             |
| GO:0043330~response to exogenous dsRNA                                          | 3     | 7.692307692 | 0.002033482 | IFNA1, IFNB1, RIGI                                                           |
| GO:0072593~reactive oxygen species metabolic process                            | 3     | 7.692307692 | 0.002277938 | NDUFA13, SFTPD, SOD1                                                         |
| GO:0034614~cellular response to reactive oxygen species                         | 3     | 7.692307692 | 0.002535599 | JUN, MAPK8, CHUK                                                             |

|                                                                                                      |   |             |             |                                             |
|------------------------------------------------------------------------------------------------------|---|-------------|-------------|---------------------------------------------|
| GO:0006955~immune response                                                                           | 6 | 15.38461538 | 0.002639876 | IFITM3, FYB1, CXCL8, CHUK, TNFSF10, MARCHF8 |
| GO:0006953~acute-phase response                                                                      | 3 | 7.692307692 | 0.003090132 | CRP, IL6, FN1                               |
| GO:0045071~negative regulation of viral genome replication                                           | 3 | 7.692307692 | 0.003696272 | IFITM3, IFNB1, MIR141                       |
| GO:0051092~positive regulation of NF-kappaB transcription factor activity                            | 4 | 10.25641026 | 0.003808581 | PYCARD, IKBKB, CHUK, MAP3K7                 |
| GO:0045766~positive regulation of angiogenesis                                                       | 4 | 10.25641026 | 0.004081234 | CXCL8, MIR21, NFE2L2, RUNX1                 |
| GO:0050766~positive regulation of phagocytosis                                                       | 3 | 7.692307692 | 0.004353218 | PYCARD, SFTPD, SOD1                         |
| GO:0043280~positive regulation of cysteine-type endopeptidase activity involved in apoptotic process | 3 | 7.692307692 | 0.005060177 | PYCARD, NDUFA13, TNFSF10                    |
| GO:0033209~tumor necrosis factor-mediated signaling pathway                                          | 3 | 7.692307692 | 0.005244639 | PYCARD, IKBKB, CHUK                         |
| GO:0018105~peptidyl-serine phosphorylation                                                           | 4 | 10.25641026 | 0.005371472 | IKBKB, MAPK8, CHUK, MAPK14                  |
| GO:0031281~positive regulation of cyclase activity                                                   | 2 | 5.128205128 | 0.00589298  | MAPK8, MAPK14                               |
| GO:0006959~humoral immune response                                                                   | 3 | 7.692307692 | 0.006415349 | IL6, IFNA1, IFNB1                           |
| GO:0007249~I-kappaB kinase/NF-kappaB signaling                                                       | 3 | 7.692307692 | 0.006415349 | IKBKB, CHUK, MAP3K7                         |
| GO:0032757~positive regulation of interleukin-8 production                                           | 3 | 7.692307692 | 0.007255831 | PYCARD, IL6, RIGI                           |
| GO:0000187~activation of MAPK activity                                                               | 3 | 7.692307692 | 0.009077402 | MAPK14, MAP3K7, SOD1                        |
| GO:0070423~nucleotide-binding oligomerization domain containing signaling pathway                    | 2 | 5.128205128 | 0.009802834 | ITCH, MAP3K7                                |
| GO:0045893~positive regulation of transcription, DNA-templated                                       | 6 | 15.38461538 | 0.013250311 | IKBKB, IL6, JUN, CHUK, NUP98, RUNX1         |
| GO:2000660~negative regulation of interleukin-1-mediated signaling pathway                           | 2 | 5.128205128 | 0.013697714 | IL6, MIR21                                  |
| GO:0030853~negative regulation of granulocyte differentiation                                        | 2 | 5.128205128 | 0.015639555 | CEACAM1, RUNX1                              |
| GO:0007179~transforming growth factor beta receptor signaling pathway                                | 3 | 7.692307692 | 0.016852104 | JUN, MIR21, MAP3K7                          |
| GO:0032755~positive regulation of interleukin-6 production                                           | 3 | 7.692307692 | 0.017486489 | PYCARD, IL6, RIGI                           |
| GO:0032760~positive regulation of tumor necrosis factor production                                   | 3 | 7.692307692 | 0.019116353 | PYCARD, IL6, RIGI                           |
| GO:0030334~regulation of cell migration                                                              | 3 | 7.692307692 | 0.019449768 | CEACAM1, MIR21, RIGI                        |
| GO:0010888~negative regulation of lipid storage                                                      | 2 | 5.128205128 | 0.019512078 | CRP, IL6                                    |



|                                                                                               |   |             |             |                                                       |
|-----------------------------------------------------------------------------------------------|---|-------------|-------------|-------------------------------------------------------|
| GO:0007229~integrin-mediated signaling pathway                                                | 3 | 7.692307692 | 0.019785639 | CEACAM1, FYB1, FN1                                    |
| GO:0050852~T cell receptor signaling pathway                                                  | 3 | 7.692307692 | 0.020464708 | IKBKB, FYB1, MAP3K7                                   |
| GO:0042058~regulation of epidermal growth factor receptor signaling pathway                   | 2 | 5.128205128 | 0.021442772 | CEACAM1, MIR21                                        |
| GO:0008284~positive regulation of cell proliferation                                          | 5 | 12.82051282 | 0.022365613 | CXCL10, IL6, MIR141, FN1, MIR21                       |
| GO:0051091~positive regulation of sequence-specific DNA binding transcription factor activity | 3 | 7.692307692 | 0.022917299 | PYCARD, IL6, RIGI                                     |
| GO:0006935~chemotaxis                                                                         | 3 | 7.692307692 | 0.024370778 | CXCL10, CXCL8, MAPK14                                 |
| GO:0038066~p38MAPK cascade                                                                    | 2 | 5.128205128 | 0.025293062 | MAPK14, MAP3K7                                        |
| GO:0050830~defense response to Gram-positive bacterium                                        | 3 | 7.692307692 | 0.026620189 | PYCARD, CRP, IL6                                      |
| GO:1904996~positive regulation of leukocyte adhesion to vascular endothelial cell             | 2 | 5.128205128 | 0.027212671 | IL6, MIR21                                            |
| GO:0010952~positive regulation of peptidase activity                                          | 2 | 5.128205128 | 0.0291286   | NDUFA13, FN1                                          |
| GO:0010803~regulation of tumor necrosis factor-mediated signaling pathway                     | 2 | 5.128205128 | 0.031040853 | PYCARD, IKBKB                                         |
| GO:0051146~striated muscle cell differentiation                                               | 2 | 5.128205128 | 0.031040853 | CHUK, MAPK14                                          |
| GO:0030194~positive regulation of blood coagulation                                           | 2 | 5.128205128 | 0.03294944  | ST3GAL4, NFE2L2                                       |
| GO:0032480~negative regulation of type I interferon production                                | 2 | 5.128205128 | 0.03294944  | ITCH, MIR21                                           |
| GO:0007165~signal transduction                                                                | 7 | 17.94871795 | 0.03586512  | PYCARD, CXCL10, CEACAM1, NRAS, CXCL8, TNFSF10, MAPK14 |
| GO:0002323~natural killer cell activation involved in immune response                         | 2 | 5.128205128 | 0.036755637 | IFNA1, IFNB1                                          |
| GO:2000406~positive regulation of T cell migration                                            | 2 | 5.128205128 | 0.036755637 | PYCARD, CXCL10                                        |
| GO:0060088~auditory receptor cell stereocilium organization                                   | 2 | 5.128205128 | 0.036755637 | SCRIB, SOD1                                           |
| GO:0019221~cytokine-mediated signaling pathway                                                | 3 | 7.692307692 | 0.037716332 | IL6, IFNA1, IFNB1                                     |
| GO:0035994~response to muscle stretch                                                         | 2 | 5.128205128 | 0.038653262 | JUN, MAPK14                                           |
| GO:0032930~positive regulation of superoxide anion generation                                 | 2 | 5.128205128 | 0.040547247 | CRP, SOD1                                             |
| GO:0033141~positive regulation of peptidyl-serine phosphorylation of STAT protein             | 2 | 5.128205128 | 0.040547247 | IFNA1, IFNB1                                          |
| GO:0070498~interleukin-1-mediated signaling pathway                                           | 2 | 5.128205128 | 0.040547247 | IKBKB, MAP3K7                                         |
| GO:0002223~stimulatory C-type lectin receptor signaling pathway                               | 2 | 5.128205128 | 0.042437598 | IKBKB, MAP3K7                                         |

|                                                                                    |   |             |             |                |
|------------------------------------------------------------------------------------|---|-------------|-------------|----------------|
| GO:0035458~cellular response to interferon-beta                                    | 2 | 5.128205128 | 0.046207428 | NDUFA13, IFNB1 |
| GO:0048026~positive regulation of mRNA splicing, via spliceosome                   | 2 | 5.128205128 | 0.049962805 | NCL, NUP98     |
| GO:1904753~negative regulation of vascular associated smooth muscle cell migration | 2 | 5.128205128 | 0.049962805 | MIR21, NFE2L2  |
| GO:0034341~response to interferon-gamma                                            | 2 | 5.128205128 | 0.049962805 | IFITM3, UBD    |
| GO:0002286~T cell activation involved in immune response                           | 2 | 5.128205128 | 0.049962805 | IFNA1, IFNB1   |

## B) Cellular Components

| GO terms                             | Count | %           | P-value     | Genes                                                                                                                        |
|--------------------------------------|-------|-------------|-------------|------------------------------------------------------------------------------------------------------------------------------|
| GO:0005576~extracellular region      | 14    | 35.8974359  | 6.79E-05    | CRP, CXCL8, IFNA1, IFNB1, SFTPD, FN1, MAPK14, SOD1, PYCARD, CXCL10, IL6, CD209, TNFSF10, ST3GAL4                             |
| GO:0008385~IkappaB kinase complex    | 3     | 7.692307692 | 6.94E-05    | PYCARD, IKBKB, CHUK                                                                                                          |
| GO:0005615~extracellular space       | 12    | 30.76923077 | 5.53E-04    | CRP, CXCL10, IL6, CXCL8, IFNA1, IFNB1, MIR141, SFTPD, TNFSF10, FN1, MIR21, SOD1                                              |
| GO:0005654~nucleoplasm               | 17    | 43.58974359 | 0.00102122  | NDUFA13, JUN, CHUK, SCRIB, MAPK14, SOD1, RUNX1, PYCARD, NXF1, ITCH, MAPK8, IRF3, SUMO1, UBD, NCL, NUP98, NFE2L2              |
| GO:0005829~cytosol                   | 19    | 48.71794872 | 0.005210377 | JUN, FYB1, CHUK, MAPK14, SOD1, PYCARD, IKBKB, NXF1, ITCH, NRAS, MAPK8, IRF3, SUMO1, CASP10, UBD, NUP98, MAP3K7, RIGI, NFE2L2 |
| GO:0005643~nuclear pore              | 3     | 7.692307692 | 0.012799343 | NXF1, SUMO1, NUP98                                                                                                           |
| GO:0005737~cytoplasm                 | 18    | 46.15384615 | 0.014630039 | NDUFA13, CHUK, MIR21, MAPK14, SOD1, PYCARD, IKBKB, NXF1, ITCH, MAPK8, IRF3, CASP10, CD209, UBD, NCL, MARCHF8, RIGI, NFE2L2   |
| GO:0035631~CD40 receptor complex     | 2     | 5.128205128 | 0.020146809 | IKBKB, CHUK                                                                                                                  |
| GO:0042405~nuclear inclusion body    | 2     | 5.128205128 | 0.023767158 | NXF1, NUP98                                                                                                                  |
| GO:0032991~macromolecular complex    | 5     | 12.82051282 | 0.039911291 | PYCARD, IFITM3, ITCH, FYB1, SOD1                                                                                             |
| GO:1990904~ribonucleoprotein complex | 3     | 7.692307692 | 0.044925141 | NCL, NUP98, RIGI                                                                                                             |
| GO:0031901~early endosome membrane   | 3     | 7.692307692 | 0.046255319 | IFITM3, ITCH, MARCHF8                                                                                                        |
| GO:0070062~extracellular exosome     | 9     | 23.07692308 | 0.046656831 | ITCH, CEACAM1, NRAS, NCL, TNFSF10, FN1, MIR21, SCRIB, SOD1                                                                   |

### C) Molecular functions

| GO terms                                                                      | Count | %           | P-value     | Genes                                                                                                                                                                                                                                                 |
|-------------------------------------------------------------------------------|-------|-------------|-------------|-------------------------------------------------------------------------------------------------------------------------------------------------------------------------------------------------------------------------------------------------------|
| GO:0042802~identical protein binding                                          | 13    | 33.33333333 | 8.73E-05    | CRP, JUN, SFTPD, FN1, SOD1, PYCARD, IKBKB, CEACAM1, IRF3, NCL, TNFSF10, MAP3K7, RIGI                                                                                                                                                                  |
| GO:0005515~protein binding                                                    | 36    | 92.30769231 | 2.37E-04    | IFITM3, CRP, NDUFA13, CXCL8, IFNA1, IKBKB, PYCARD, NXF1, NRAS, MAPK8, SUMO1, CASP10, UBD, TNFSF10, MARCHF8, MAP3K7, JUN, FYB1, CHUK, IFNB1, SFTPD, FN1, SCRIB, MAPK14, RUNX1, SOD1, CXCL10, ITCH, IL6, CEACAM1, IRF3, CD209, NCL, NUP98, RIGI, NFE2L2 |
| GO:0045236~CXCR chemokine receptor binding                                    | 3     | 7.692307692 | 4.08E-04    | CXCL10, ITCH, CXCL8                                                                                                                                                                                                                                   |
| GO:0004707~MAP kinase activity                                                | 3     | 7.692307692 | 4.66E-04    | MAPK8, MAPK14, MAP3K7                                                                                                                                                                                                                                 |
| GO:0019899~enzyme binding                                                     | 6     | 15.38461538 | 0.001052677 | PYCARD, JUN, MAPK8, SUMO1, FN1, MAPK14                                                                                                                                                                                                                |
| GO:0044389~ubiquitin-like protein ligase binding                              | 3     | 7.692307692 | 0.001059921 | ITCH, JUN, SUMO1                                                                                                                                                                                                                                      |
| GO:0008384~IkappaB kinase activity                                            | 2     | 5.128205128 | 0.006029816 | IKBKB, CHUK                                                                                                                                                                                                                                           |
| GO:0005125~cytokine activity                                                  | 4     | 10.25641026 | 0.006734932 | IL6, IFNA1, IFNB1, TNFSF10                                                                                                                                                                                                                            |
| GO:0004674~protein serine/threonine kinase activity                           | 5     | 12.82051282 | 0.007754702 | IKBKB, MAPK8, CHUK, MAPK14, MAP3K7                                                                                                                                                                                                                    |
| GO:0097110~scaffold protein binding                                           | 3     | 7.692307692 | 0.008510377 | IKBKB, CHUK, MAP3K7                                                                                                                                                                                                                                   |
| GO:0000976~transcription regulatory region sequence-specific DNA binding      | 4     | 10.25641026 | 0.012214656 | JUN, IRF3, NFE2L2, RUNX1                                                                                                                                                                                                                              |
| GO:0042803~protein homodimerization activity                                  | 6     | 15.38461538 | 0.013813531 | PYCARD, IKBKB, CEACAM1, CHUK, IRF3, RUNX1                                                                                                                                                                                                             |
| GO:0005138~interleukin-6 receptor binding                                     | 2     | 5.128205128 | 0.014014526 | PYCARD, IL6                                                                                                                                                                                                                                           |
| GO:0019903~protein phosphatase binding                                        | 3     | 7.692307692 | 0.015056416 | CEACAM1, MAPK8, MAPK14                                                                                                                                                                                                                                |
| GO:0097153~cysteine-type endopeptidase activity involved in apoptotic process | 2     | 5.128205128 | 0.019962039 | PYCARD, CASP10                                                                                                                                                                                                                                        |
| GO:1990459~transferrin receptor binding                                       | 2     | 5.128205128 | 0.021936769 | IKBKB, CHUK                                                                                                                                                                                                                                           |
| GO:0031625~ubiquitin protein ligase binding                                   | 4     | 10.25641026 | 0.023450741 | JUN, SUMO1, CASP10, RIGI                                                                                                                                                                                                                              |
| GO:0005524~ATP binding                                                        | 8     | 20.51282051 | 0.032522772 | IKBKB, NDUFA13, MAPK8, CHUK, MAPK14, MAP3K7, RIGI, RUNX1                                                                                                                                                                                              |
| GO:0005132~type I interferon receptor binding                                 | 2     | 5.128205128 | 0.033704047 | IFNA1, IFNB1                                                                                                                                                                                                                                          |
| GO:0004672~protein kinase activity                                            | 4     | 10.25641026 | 0.040407787 | IKBKB, CHUK, MAPK14, MAP3K7                                                                                                                                                                                                                           |
| GO:0005102~receptor binding                                                   | 4     | 10.25641026 | 0.045335642 | CXCL10, FYB1, TNFSF10, FN1                                                                                                                                                                                                                            |
| GO:0008201~heparin binding                                                    | 3     | 7.692307692 | 0.048850691 | CXCL10, CXCL8, FN1                                                                                                                                                                                                                                    |

**Supplementary Table S5: Top ten hub genes by their rank based on MCC analysis**

| Rank | MCC    | Degree | MNC    | DMNC    |
|------|--------|--------|--------|---------|
| 1    | IL6    | JUN    | JUN    | TNFSF10 |
| 2    | CXCL8  | IL6    | IL6    | PYCARD  |
| 3    | JUN    | IKBKB  | IKBKB  | CXCL10  |
| 4    | IKBKB  | CXCL8  | CXCL8  | CHUK    |
| 5    | DDX58  | DDX58  | DDX58  | CD209   |
| 6    | CXCL10 | IFNB1  | IFNB1  | IFNA1   |
| 7    | IFNB1  | IFNA1  | IFNA1  | IRF3    |
| 8    | IFNA1  | CXCL10 | CXCL10 | IFNB1   |
| 9    | IRF3   | IRF3   | IRF3   | CRP     |
| 10   | CHUK   | CHUK   | CHUK   | CXCL8   |

Supplementary Figure S1: Protein-protein interactions for Local Topological Analysis Methods

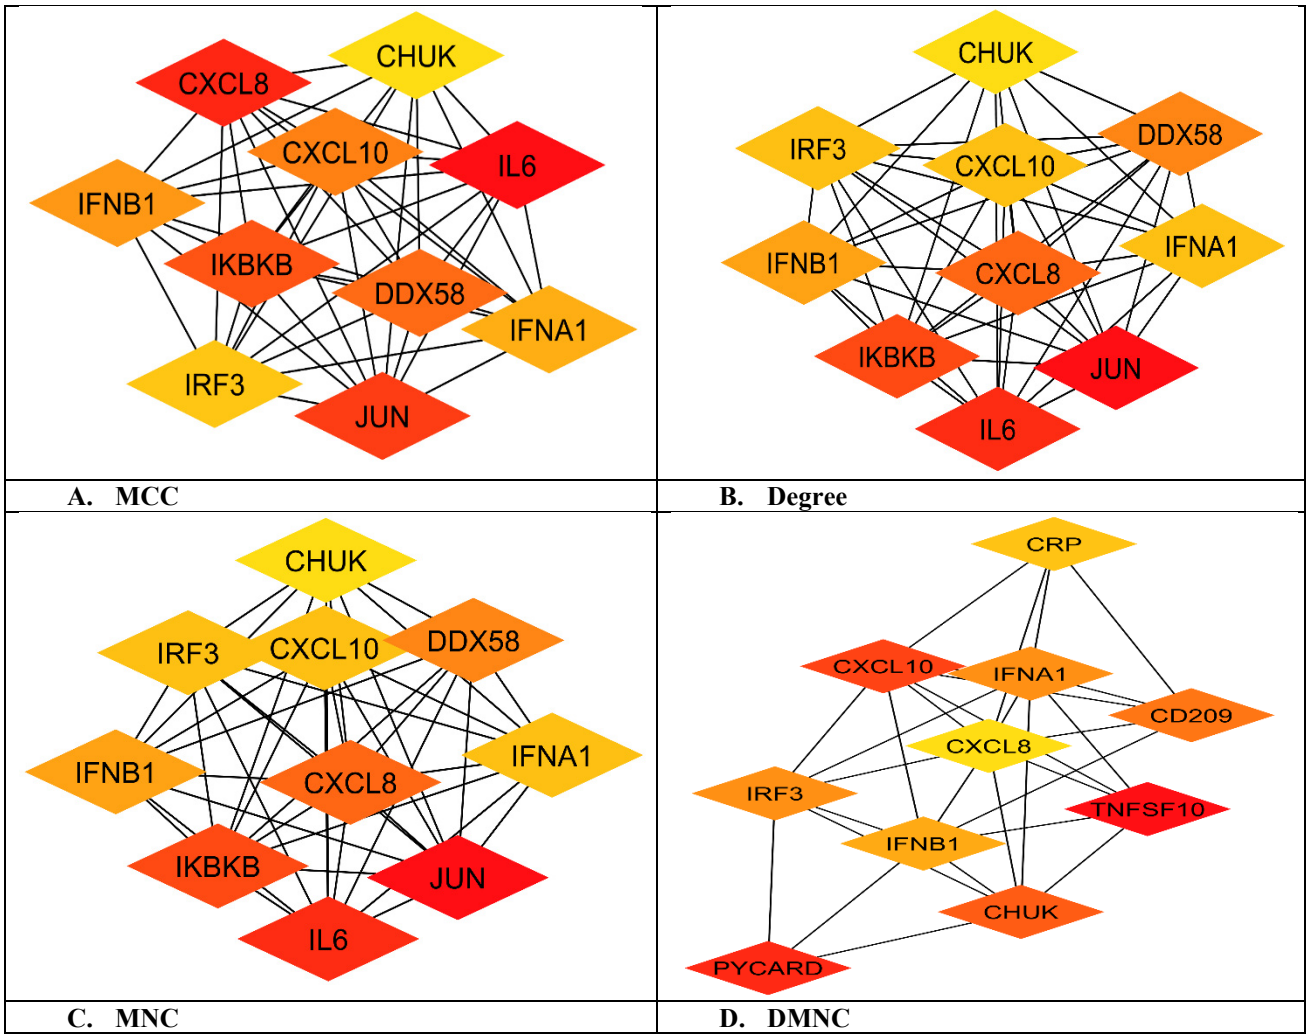

Supplement: s1 [file s1]
